# Supplementary material for: RCAN1-4 is a thyroid cancer growth and metastasis suppressor
Source: JCI journal article supplement (doi:10.1172/jci.insight.90651), 2017-03-08

## Supplemental Figures

### Supplemental Figure S1

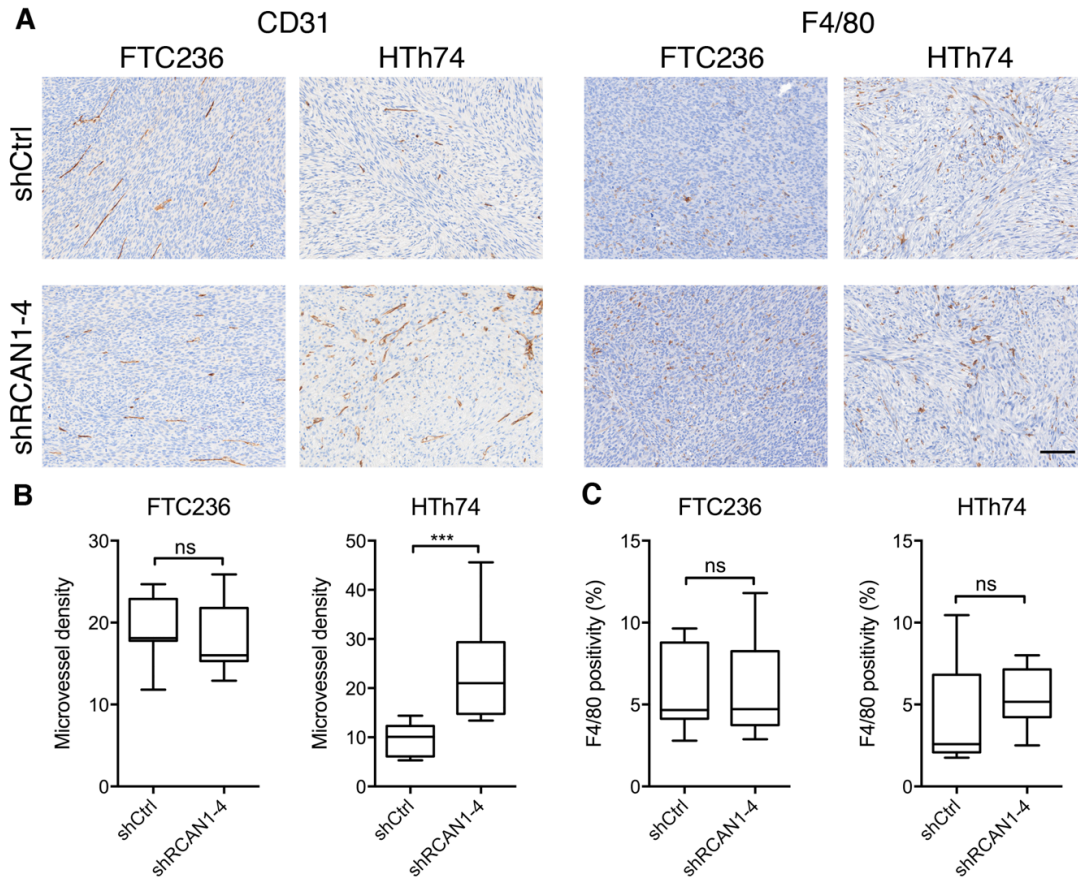

**Supplemental Figure S1. CD31 and F4/80 IHC staining of subcutaneous xenograft tumors.** (A) Representative CD31 and F4/80 IHC staining images of the tumors. (B and C) Boxplots of CD31 staining (B) and F4/80 staining (C) for all tumors. The boxplots were generated using the Tukey method. Medline in the box represents the median value. The box boundaries are the Q1 (25%) and Q3 (75%) respectively (n = 7 - 9). Linear mixed models were used to perform all the statistical analyses. \*\*\* $P < 0.001$ , ns: not significant.

**Supplemental Figure S2**

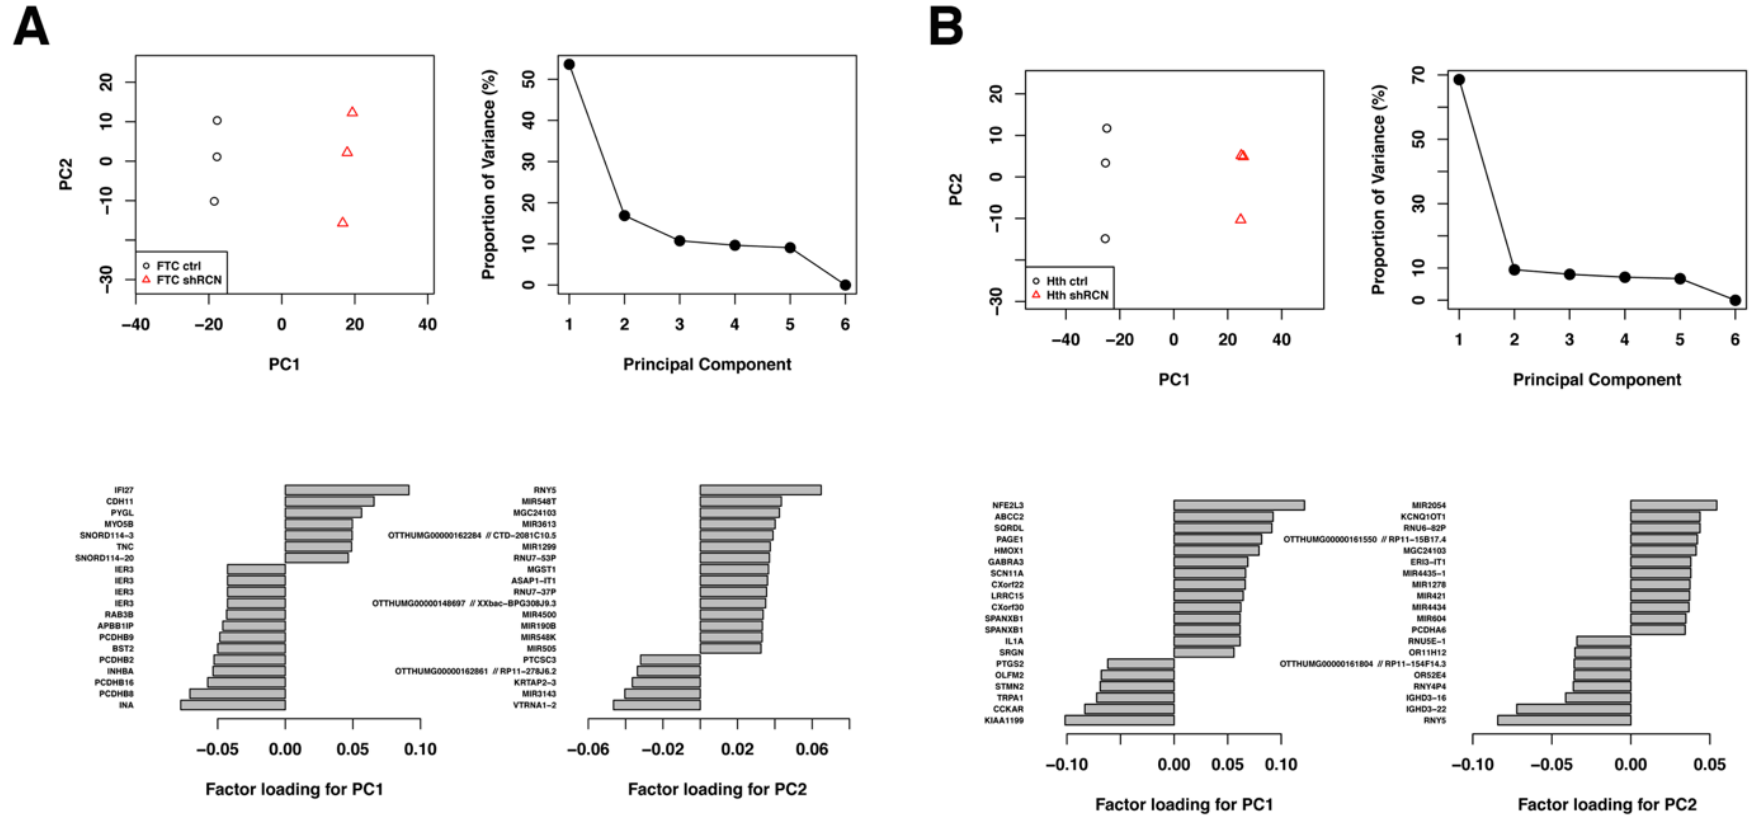

**Supplemental Figure S2. Principal component analysis of the microarray data. (A and B)** The shRCAN1-4 and shCtrl cells were well separated by the first principal components (PC1) for both FTC236 cells (**A**) and HTh74 cells (**B**).

**Supplemental Figure S3**

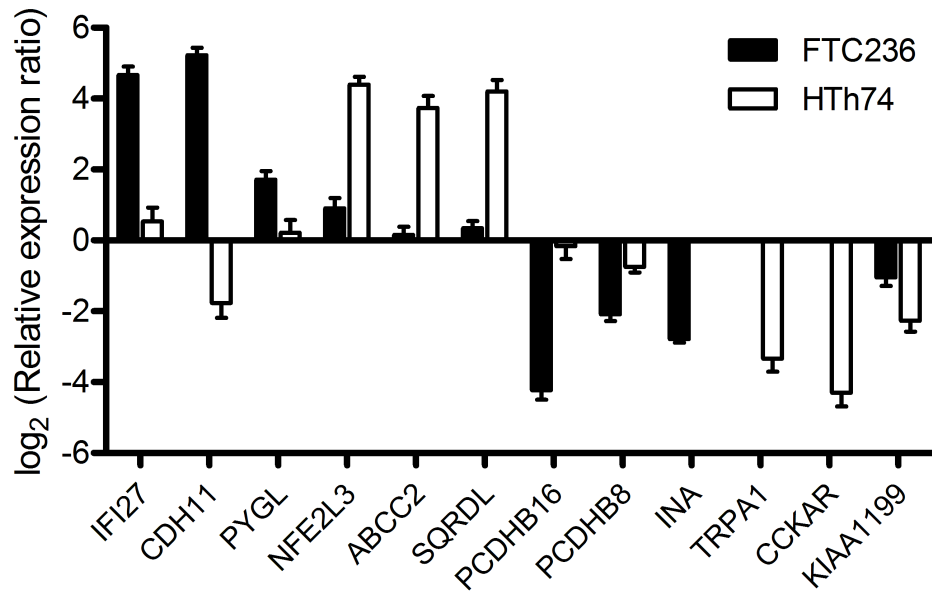

**Supplemental Figure S3. Expression of Principal Component genes from both cell lines.** qRT-PCR was performed for the top three overexpressed genes from FTC236 (IFI27, CDH11, PYGL) and HTh74 cells (NFE2L3, ABCC2, SQRDL) and the top three downregulated genes from FTC236 (PCDHB16, PCDHB8, INA) and HTh74 cells (TRPA1, CCKAR, KIAA1199). NFE2L3 was the most consistently overexpressed genes for both cell lines. The relative expression ratio was log2 transformed. 18S ribosomal RNA was used as control for quantitation. Each experiment was repeated three times with duplicate samples. Data were expressed as mean  $\pm$  SEM.

#### Supplemental Figure S4

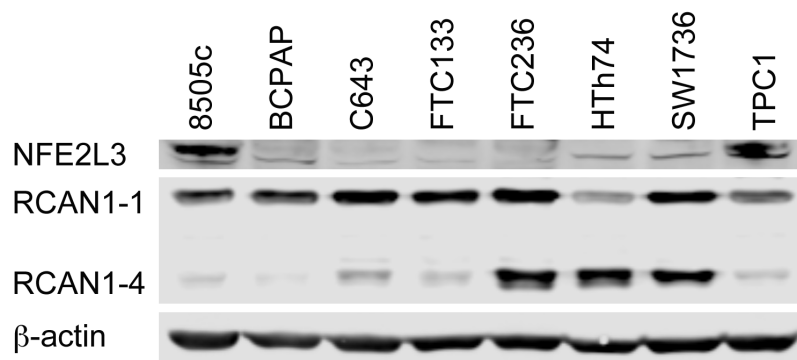

**Supplemental Figure S4. The inverse correlation between RCAN1-4 and NFE2L3 in thyroid cancer cell lines.** NFE2L3 and RCAN1-4 expression in eight different thyroid cancer cell lines were analyzed using Western blot. Actin was the loading control.

### Supplemental Figure S5

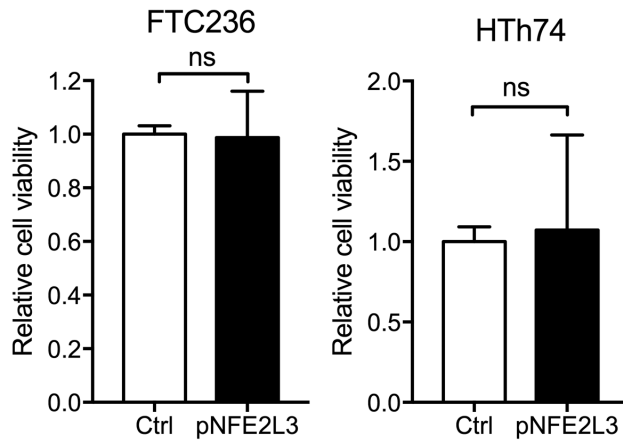

**Supplemental Figure S5. NFE2L3 overexpression does not affect cell 3D spheroid growth.** The shCtrl cells were transfected with control plasmid (Ctrl) or NFE2L3 plasmid (pNFE2L3) and subjected to 3D spheroid assay. Cell viability was quantified and normalized to the control plasmid-transfected cells. A linear mixed model was used to determine the statistical significance. ns: not significant.

**Supplemental Table 1. Clinical sample pathological information and the IHC scores for each available sample.** The IHC score is given a 0-3 scale based on intensity. – : 0, ± : 1, +: 2, ++: 3. Representative score from one researcher was shown. Empty spaces indicate the corresponding samples are not available. PTC: Papillary thyroid cancer; FTC: Follicular thyroid cancer; ATC: Anaplastic thyroid cancer.

**Supplemental Table 1**

| ID    | Histology | Normal | Tumor Center | Tumor Invasive Front | Metastasis | Metastasis Sites |
|-------|-----------|--------|--------------|----------------------|------------|------------------|
| OSU3  | PTC       | -      |              |                      |            |                  |
| OSU6  | PTC       | -      | +            | ++                   | +          | Lung             |
| OSU9  | PTC       |        |              |                      | +          | Lung             |
| OSU10 | PTC       |        |              |                      | +          | Lung             |
| OSU14 | PTC       |        | ±            | +                    | +          | Kidney           |
| OSU16 | PTC       |        |              |                      | +          | Lung             |
| OSU19 | PTC       |        |              |                      | +          | Lung             |
| OSU21 | PTC       | -      | ±            | +                    |            |                  |
| OSU32 | PTC       | ±      | +            | ++                   |            |                  |
| OSU1  | FTC       | -      | -            | ++                   | ++         | Soft tissue      |
| OSU2  | FTC       | -      | -            | +                    | ++         | Bone             |
| OSU7  | FTC       | -      | +            |                      | +          | Bone             |
| OSU15 | FTC       | -      | ±            | -                    | ±          | Bone             |
| OSU31 | FTC       | -      | ±            | +                    | +          | Pancreas         |
| OSU18 | ATC       | -      | ±            | +                    |            |                  |

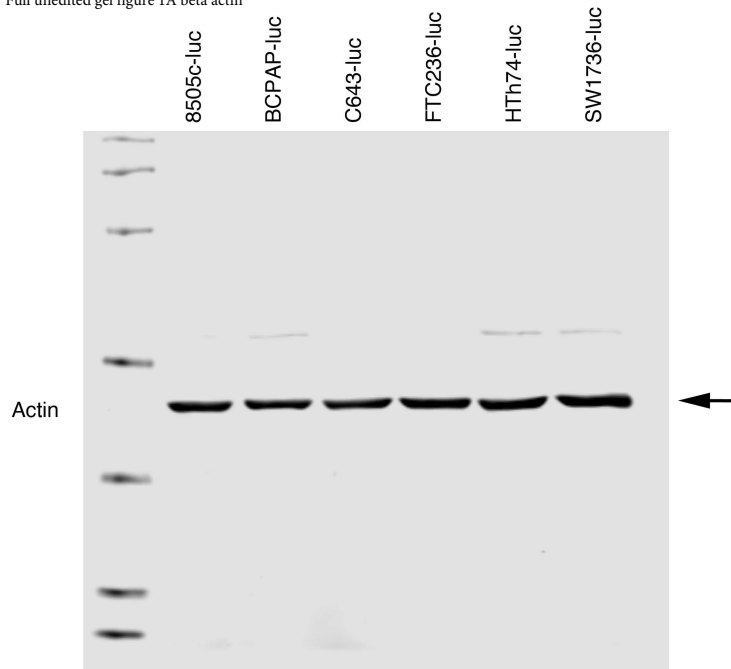

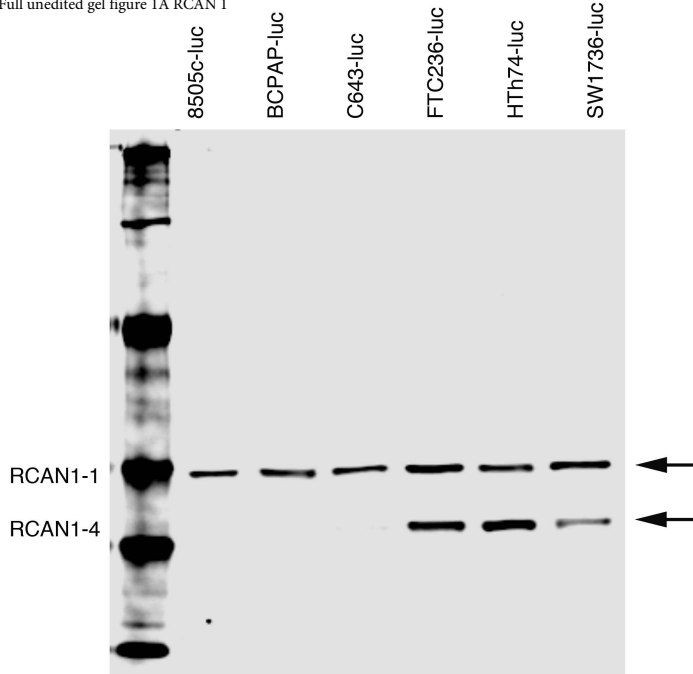



Full unedited gel  
figure 1B beta actin

FTC236

HTh74

shCtrl

shRCAN1-4

shCtrl

shRCAN1-4

Actin

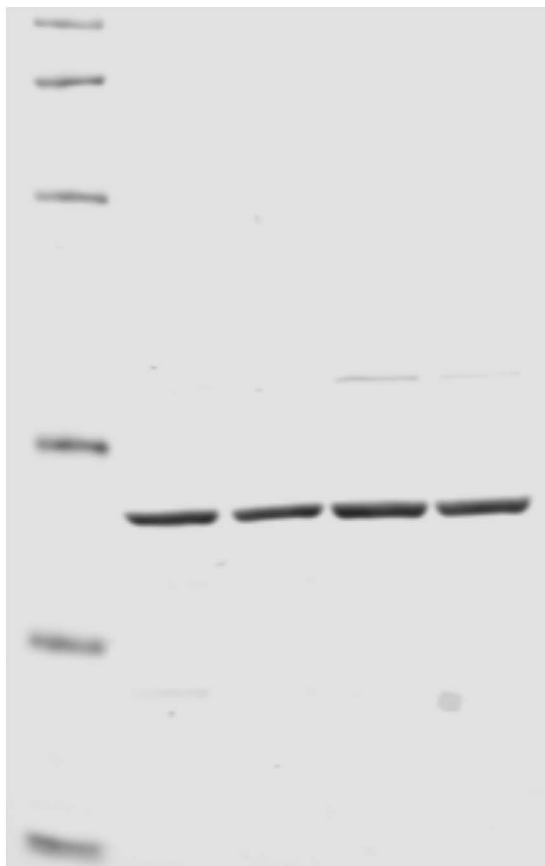

Full unedited gel figure 1B  
RCAN1 long Exposure

FTC236

HTh74

shCtrl

shRCAN1-4

shCtrl

shRCAN1-4

RCAN1-1

RCAN1-4

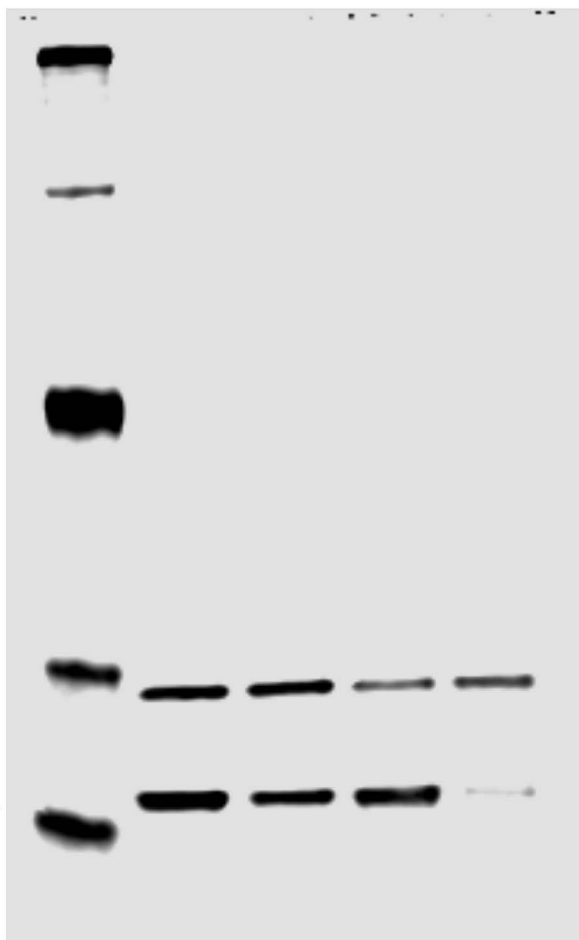

Full unedited gel figure 1B  
RCAN1 Short Exposure

FTC236

HTh74

shCtrl  
shRCAN1-4

shCtrl  
shRCAN1-4

RCAN1-1

RCAN1-4

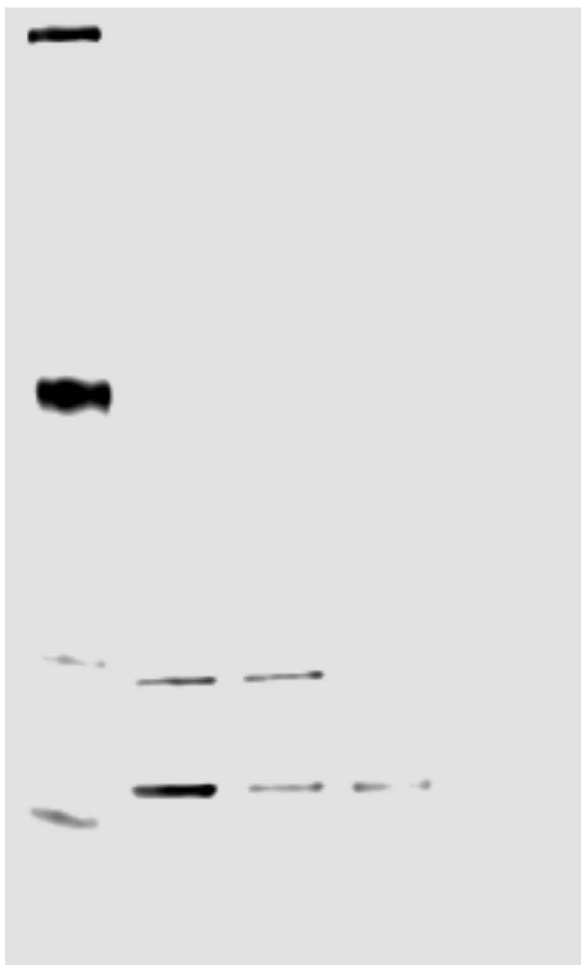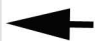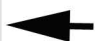

Full unedited gel Figure 5A beta actin

Actin

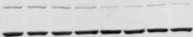

Full unedited gel Figure 5A RCAN1 long exposure

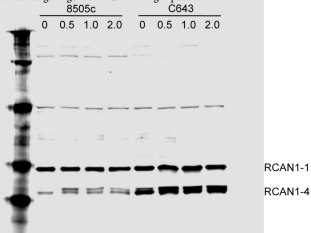

Full unedited gel Figure 5A RCAN1 short exposure

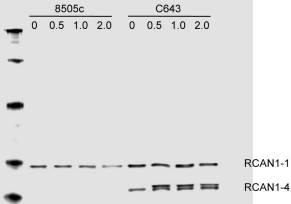

FTC236

HTH74

HEK

Full unedited gel Figure 6D beta actin

shCtrl

shRCAN1-4

shCtrl

shRCAN1-4

Ctrl

NFE2L3

Actin

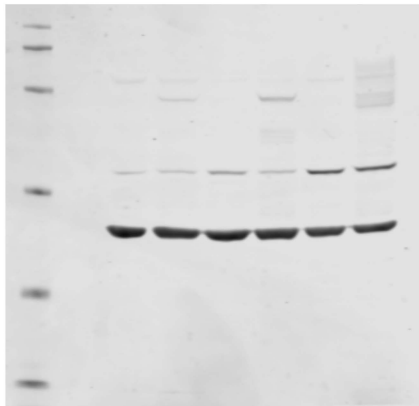

Full unedited gel  
Figure 6D NFE2L3

FTC236

HTh74

HEK

shCtrl

shRCAN1 -4

shCtrl

shRCAN1 -4

Ctrl

NFE2L3

NFE2L3

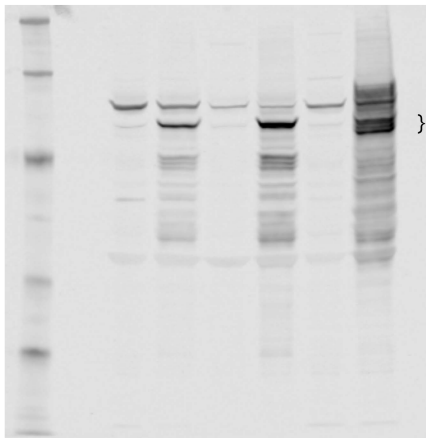



HEK

FTC236

HTh74

pCtrl  
pNFE2L3

Marker

siCtrl  
siNFE2L3

siCtrl  
siNFE2L3

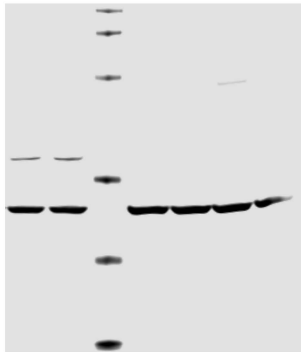

HEK

FTC236

HTh74

pCtrl  
pNFE2L3

Marker

siCtrl  
siNFE2L3siCtrl  
siNFE2L3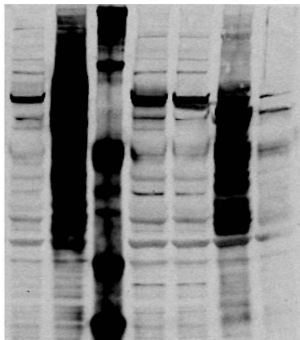

NFE2L3 {

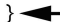

HEK

FTC236

HTh74

pCtrl  
pNFE2L3

Marker

siCtrl  
siNFE2L3siCtrl  
siNFE2L3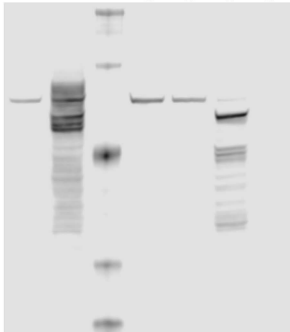

Full unedited gel figure 7B

NFE2L3 short exposure

NFE2L3 {

}

FTC236

HTh74

HEK

Full unedited gel Figure 8B  
beta actin

Ctrl

pNFE2L3

Ctrl

pNFE2L3

Ctrl

pNFE2L3

Actin

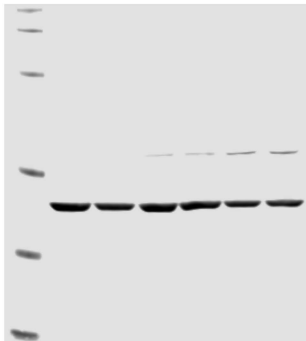

FTC236

HTh74

HEK

Full unedited gel Figure 8B  
NFE2L3

Ctrl

pNFE2L3

Ctrl

pNFE2L3

Ctrl

pNFE2L3

NFE2L3

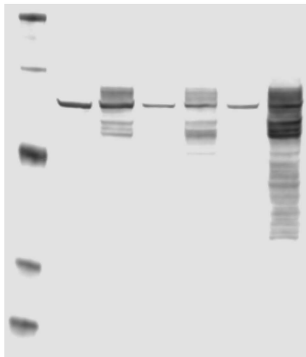

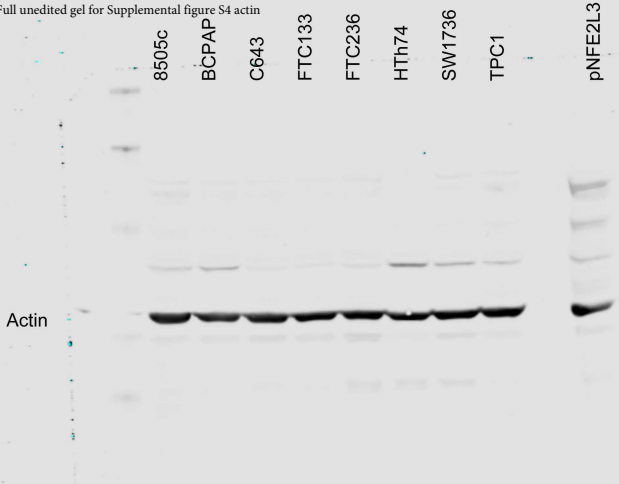

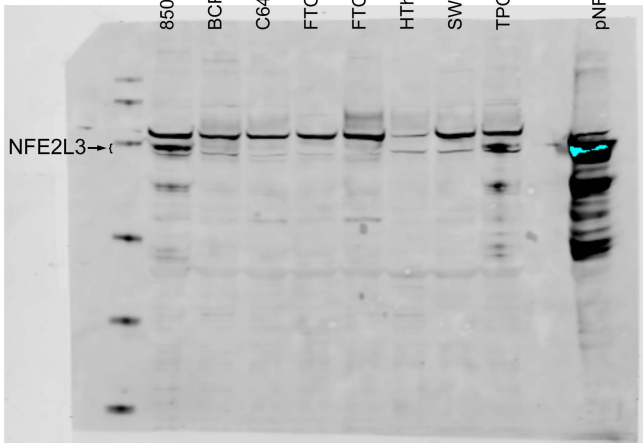

pNFE2L3

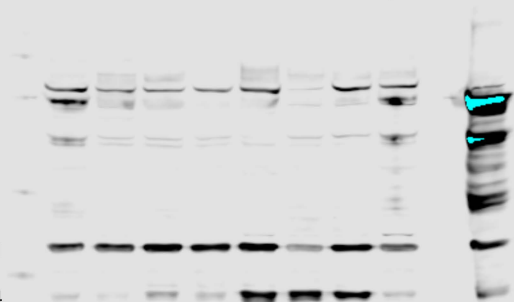

Supplement: sd1 [file 1]
